# Supplementary material for: Development and evaluation of processes affecting simulation of diel fine particulate matter variation in the GEOS-Chem model
Source: Copernicus journal article supplement (doi:10.5194/acp-23-12525-2023), 2023-10-09
Supplement: Supplementary file 1 [file acp-23-12525-2023-supplement.pdf]

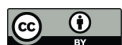

*Supplement of*

## **Development and evaluation of processes affecting simulation of diel fine particulate matter variation in the GEOS-Chem model**

**Yanshun Li et al.**

*Correspondence to:* Yanshun Li ([yanshun.li@wustl.edu](mailto:yanshun.li@wustl.edu))

The copyright of individual parts of the supplement might differ from the article licence.

### **S1. The Federal Equivalent Method (FEM) in situ sites.**

Fig. S1b shows the diel variation of the nine types of instruments used at FEM in-situ sites, which provide hourly measurements of  $\text{PM}_{2.5}$  across the contiguous US. The number and location of instrument types are in Fig. 1. The majority (90.2%) of these instruments belongs to the first four types, which are shown in Fig. S1a. They exhibit generally consistent average diel profile of measured  $\text{PM}_{2.5}$  mass, which we target as the typical variation to investigate. The other five types, shown as colored or dashed curves in Fig. S1b, deviated from the typical profiles. Specifically, the Teledyne Model 602 reports  $\text{PM}_{2.5}$  concentrations variability which largely deviates from the typical pattern in Fig. S1a. The GRIMM Model 180 reports a pronounced morning peak. The Met One BAM-1022 exhibits a morning minimum of  $\text{PM}_{2.5}$ . The TEOM 1400 reports notably lower concentrations from midnight to early morning. Considering that these five types of instruments with deviated  $\text{PM}_{2.5}$  diel patterns only account for less than 10% in all types, we exclude them from our analysis. Our analysis focuses on investigating the typical diel cycles in Fig. S1a.

### **S2. Spatial distribution of $\text{PM}_{2.5}$ in GEOS-Chem simulations and in situ measurements**

Fig. S2a maps the annual  $\text{PM}_{2.5}$  concentrations over the contiguous US simulated by the GC\_Base simulation with the FEM/FRM in-situ measurements overlaid. The observed  $\text{PM}_{2.5}$  concentrations are elevated over large parts of the Eastern contiguous US and the west coast. Other regions, primarily the mountainous Midwest, have relatively lower  $\text{PM}_{2.5}$  levels with annual average concentrations below  $10 \mu\text{g}/\text{m}^3$ . Nevertheless, local hotspots can still be identified for major cities (Denver, Salt Lake City, Phoenix) and national forests vulnerable to open fires (Nez Perce-Clearwater near the state boundary of Idaho/Montana, Okanogan-Wenatchee in north WA). The GC\_Base simulation broadly captures the observed spatial variation of annual mean  $\text{PM}_{2.5}$  over the contiguous US in 2016 with the Root Mean Square Deviations (RMSD) against the FRM/FEM in-situ measurements of  $3.35/3.75 \mu\text{g}/\text{m}^3$ . The statistics for the FEM and FRM sites are consistent, providing a measure of confidence in the data quality of the hourly FEM measurements. The simulated concentrations are systematically biased high against observations by 28%. The contributors to this bias are peripherally explored but are not the main focus of this work. Fig. S2b maps the annual concentrations by the GC\_2m\_PBLH\_NIT simulation, in which temporal resolution of emissions is increased from monthly to hourly, dry deposition scheme is updated, boundary layer height is adjusted, the vertical representativeness differences between model and observations are resolved and nitrate is constrained. The RMSD of the GC\_2m\_PBLH\_NIT  $\text{PM}_{2.5}$  against the FEM/FRM measurements drops from  $3.35/3.75$  to  $2.74/2.84 \mu\text{g}/\text{m}^3$ . The overestimation of  $\text{PM}_{2.5}$  in Eastern contiguous US and the west coast is reduced. These results indicate that our model updates improve on the simulation of annual mean concentrations.

### **S3. Design of supplementary simulations for investigating chemical pathways of nighttime $\text{PM}_{2.5}$ nitrate formation in GEOS-Chem**

Following Travis et al., (2022), four additional sensitivity simulations (Table S3) were conducted based on GC\_2m (Table 1) for identifying primary chemical pathways of nighttime  $\text{PM}_{2.5}$  nitrate in GEOS-Chem. As shown in Table S3, GC\_Chem\_S1 turns off  $\text{NO}_2$  hydrolysis (reaction R1), GC\_Chem\_S2 turns off  $\text{N}_2\text{O}_5$  hydrolysis (reaction R2&R3), GC\_Chem\_S3 turns off  $\text{NO}_3$  hydrolysis (reaction R4), and GC\_Chem\_S4 turns off all nighttime nitrate chemistry in GEOS-Chem (reaction R1-R4). In reaction R2,  $\phi=1$  for sea salt aerosol and  $\phi=0$  for all other aerosol types (Travis et al., 2022).

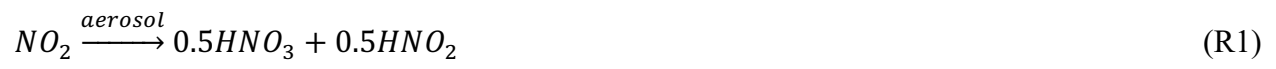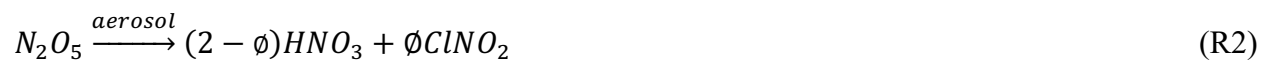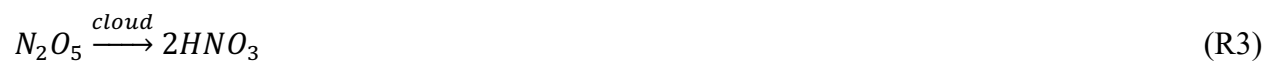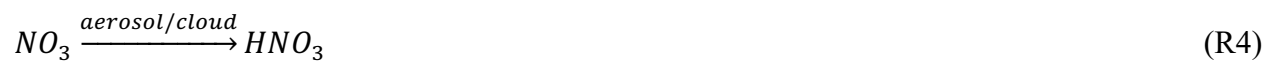

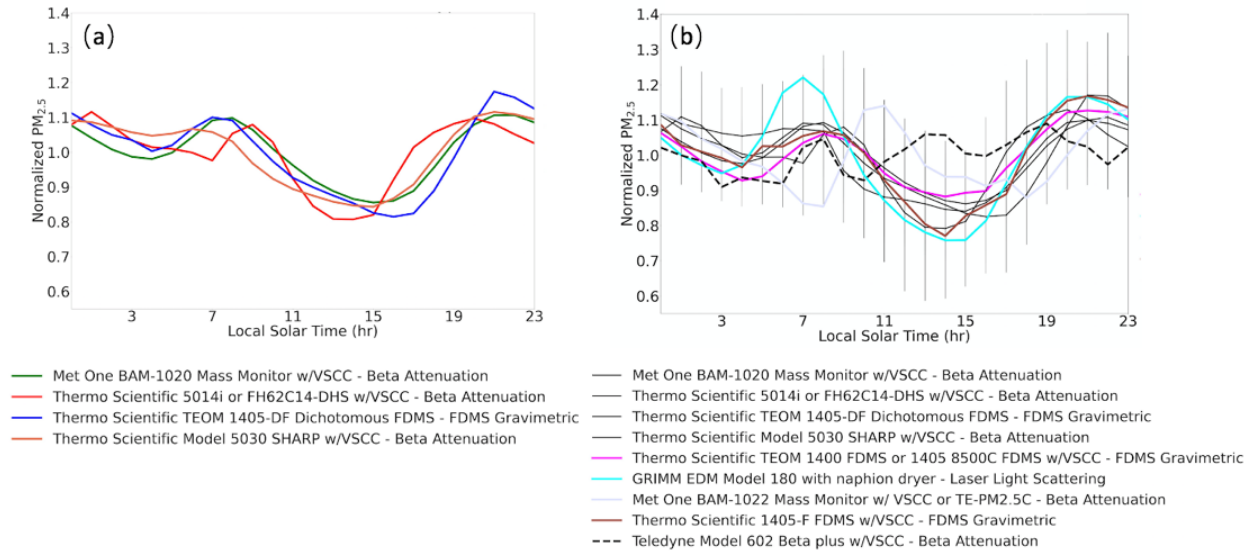

**Figure S1.** Average diel PM<sub>2.5</sub> variation of different FEM in-situ instruments over the contiguous US in 2016. (a) The major four types of instruments with typical diel PM<sub>2.5</sub> cycles. (b) All types of instruments.

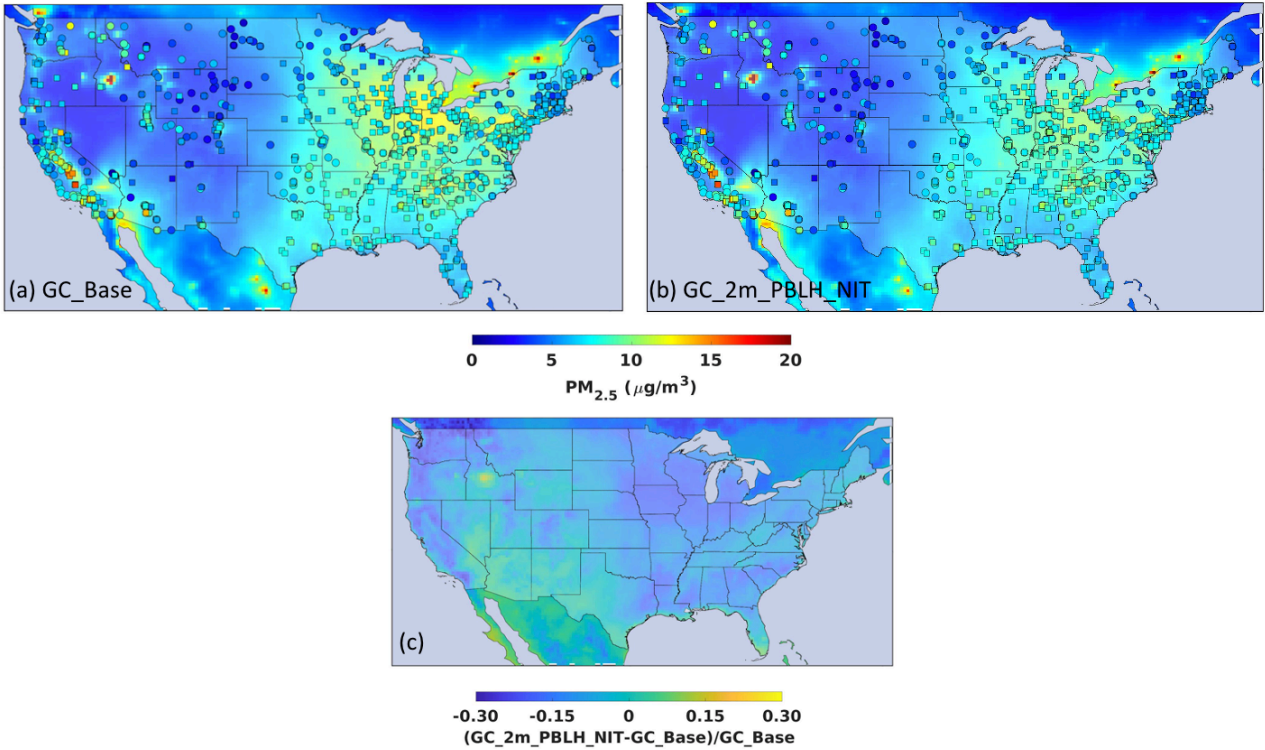

**Figure S2.** Annual PM<sub>2.5</sub> concentrations over the contiguous US in 2016. The background maps show modeled annual PM<sub>2.5</sub> concentrations by (a) the GC\_Base simulation and (b) the GC\_2m\_PBLH\_NIT simulation. (c) The difference between GC\_Base and GC\_2m\_PBLH\_NIT, calculated as  $(GC\_2m\_PBLH\_NIT - GC\_Base) / GC\_Base$ . Overlaid filled circles represent in-situ FEM measurements. Filled squares represent in-situ FRM measurements.

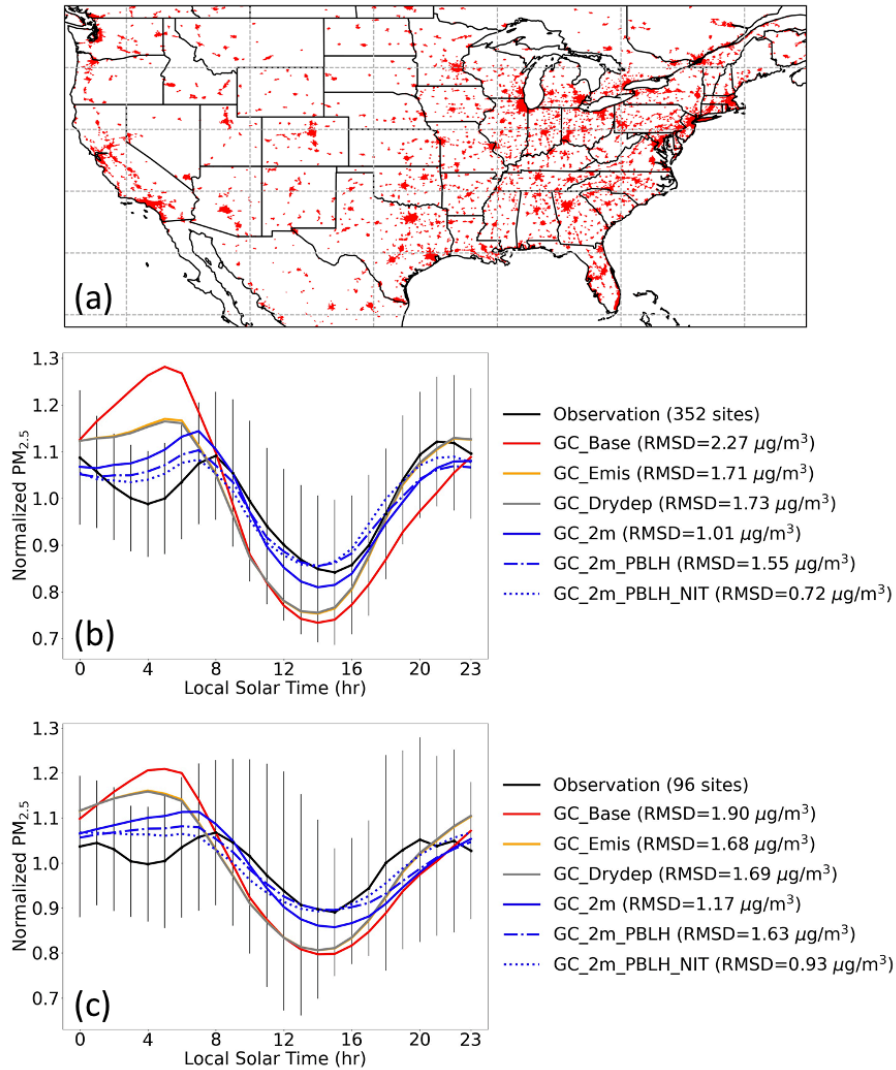

**Figure S3.** (a) Urban extent from the GRUMP v1 data. (b) Diel  $PM_{2.5}$  over urban areas in the contiguous US. (c) Diel  $PM_{2.5}$  over rural areas in the contiguous US.

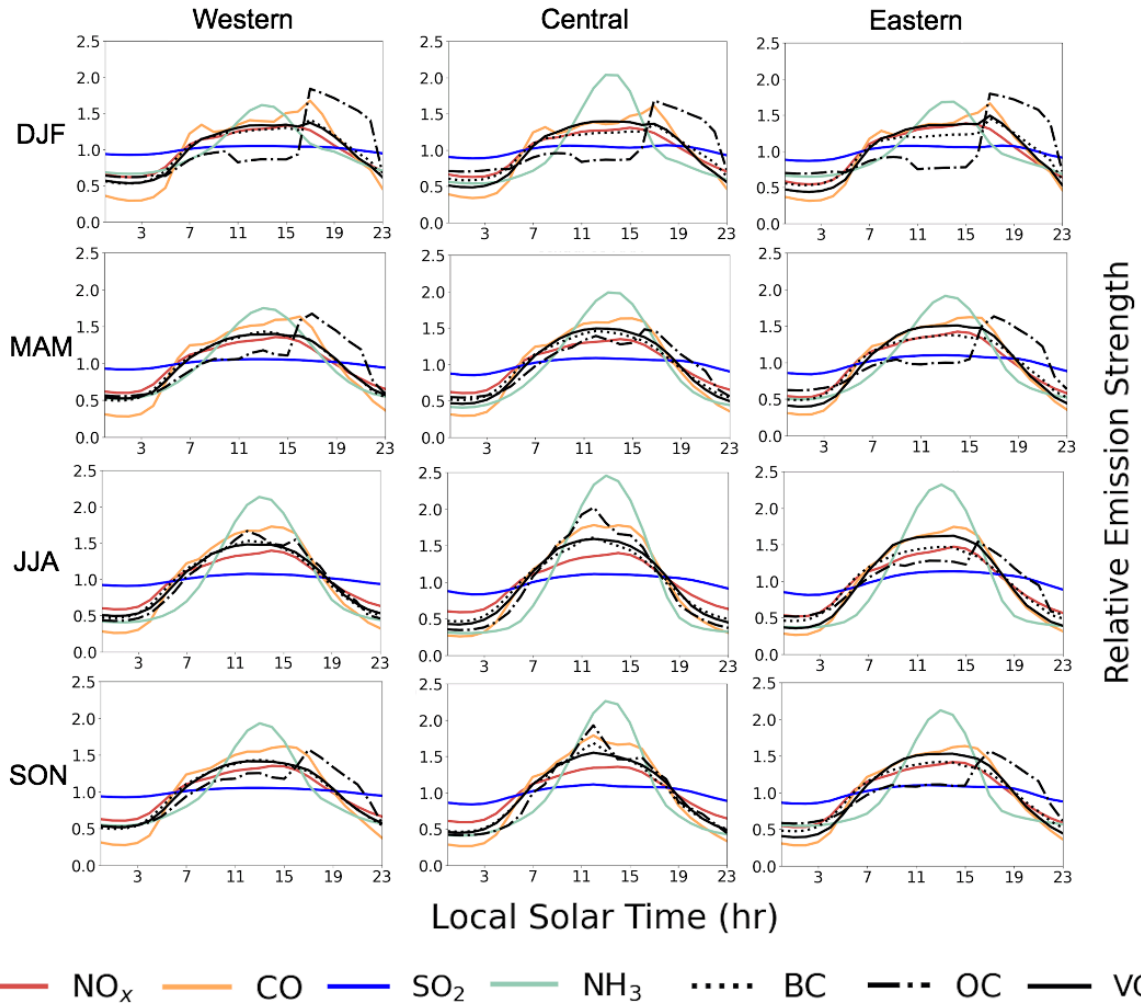

**Figure S4.** Normalized mean seasonal and regional diel profiles of speciated emissions from the EPA National Emission Inventory (NEI).

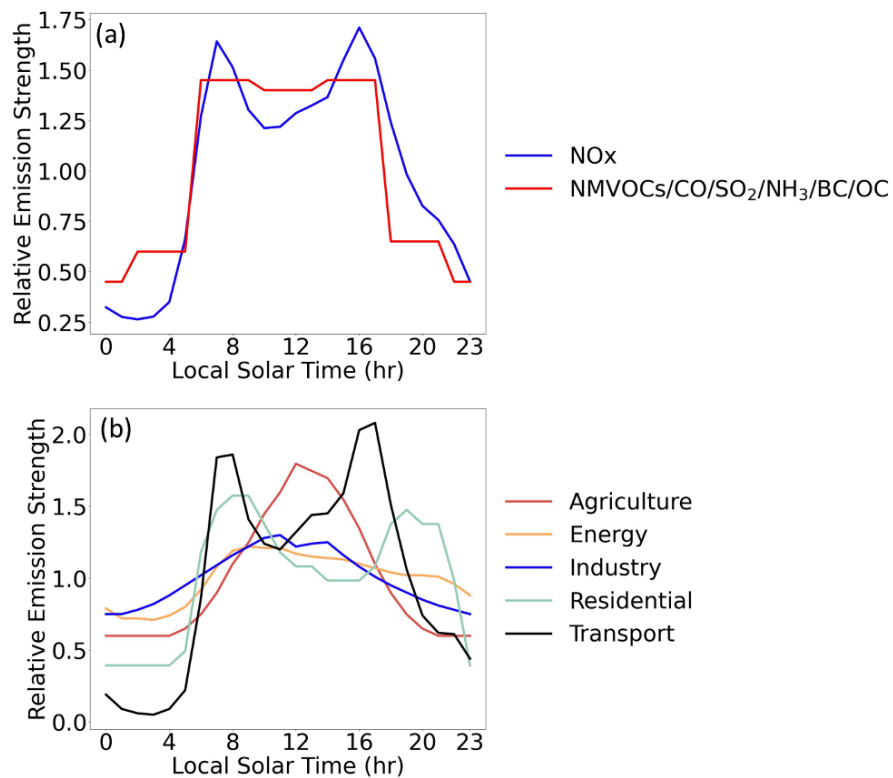

**Figure S5.** (a) Default species-specific diel scaling factors used in emission module of GEOS-Chem v12.6.0. (b) Sectoral diel scaling factors proposed in GEOS-Chem 14 (<https://github.com/geoschem/geos-chem/issues/1824>).



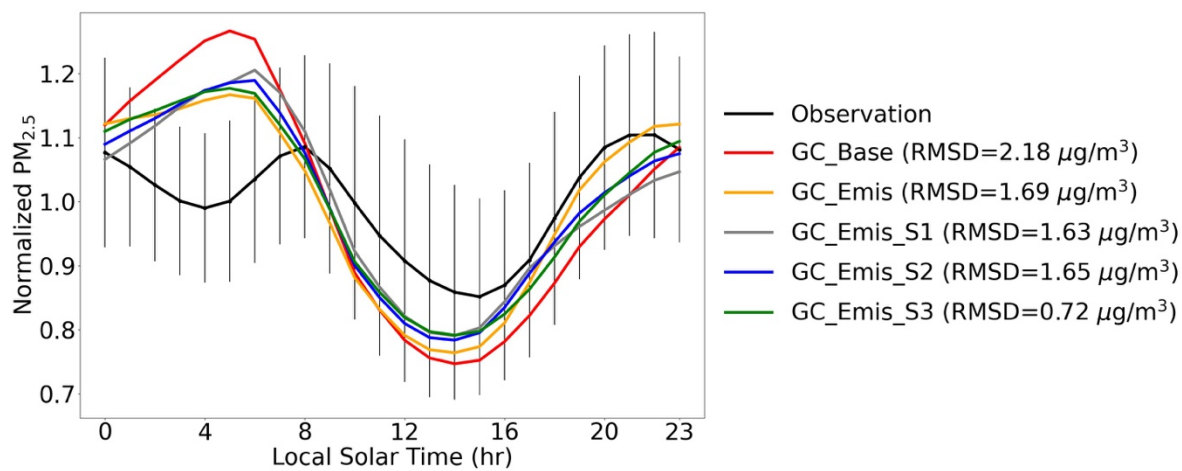

**Figure S6.** Diel PM<sub>2.5</sub> in sensitivity simulations in Table S2, GC\_Emis, GC\_Base and the FEM measurements.

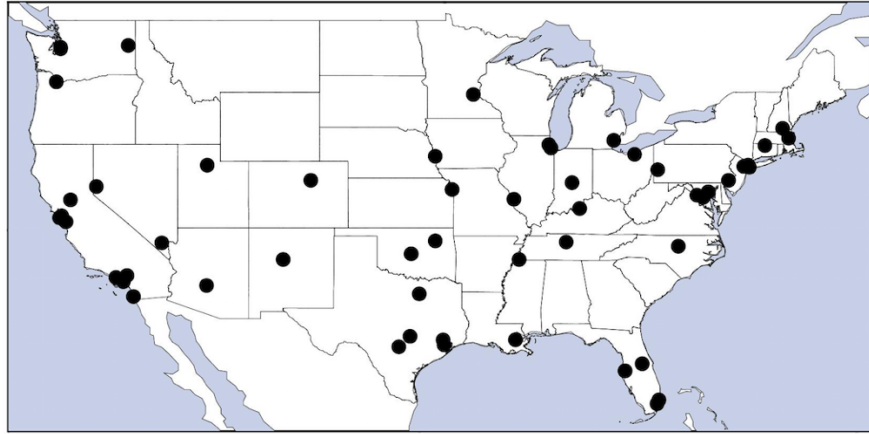

**Figure S7.** The Aircraft Meteorological Data Reports (AMDAR) sites.

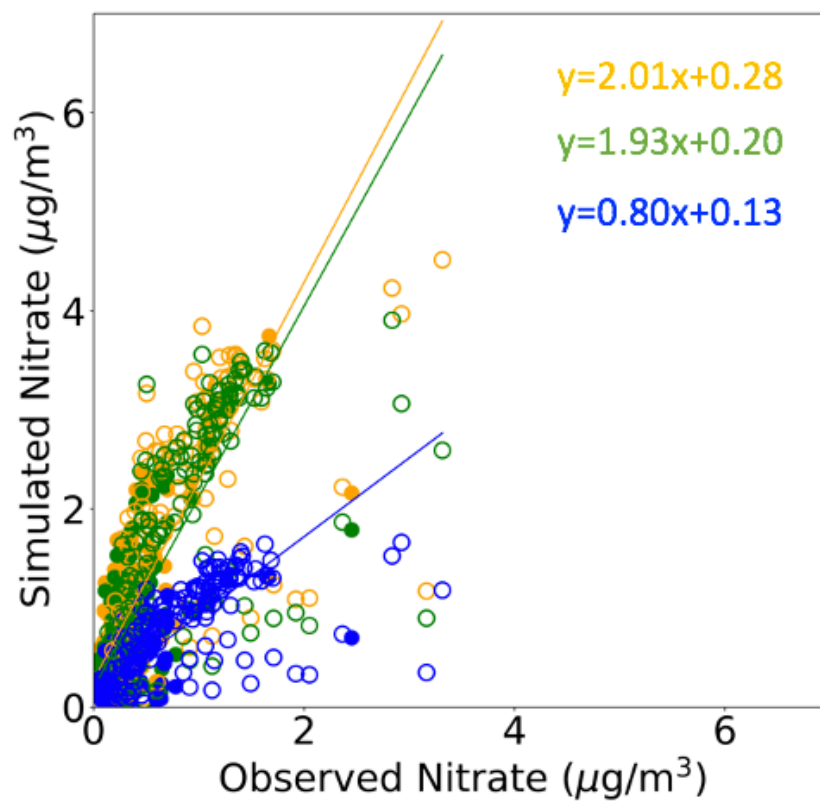

**Figure S8.** Mass concentrations of nitrate  $\text{PM}_{2.5}$  in the GC\_Base (orange), GC\_2m\_PBLH (green) and GC\_Chem\_S2 simulations (Table 1 & S3) in 2016. The filled/hollow circles represent in situ observations from the IMPROVE/CSN network (Solomon et al., 2014) respectively. Solid lines indicate lines of best fit determined with reduced major axis linear regression.

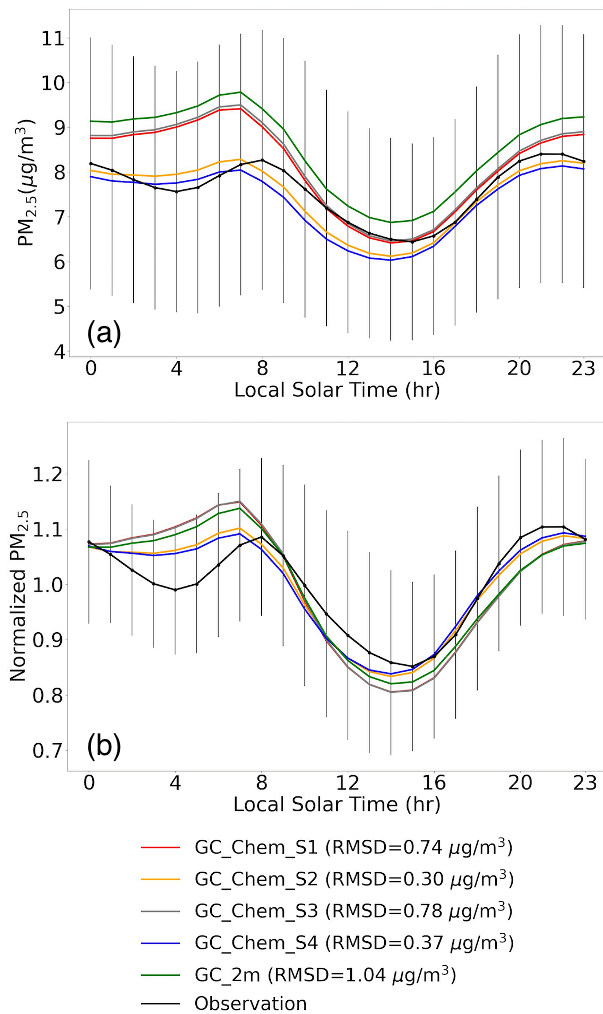

**Figure S9.** Diel profiles of PM<sub>2.5</sub> in the sensitivity simulations investigating nitrate chemical pathways during the night (Table S3). (a) PM<sub>2.5</sub> concentrations. (b) Normalized PM<sub>2.5</sub>. Vertical lines represent spatial standard deviation of the measurements.

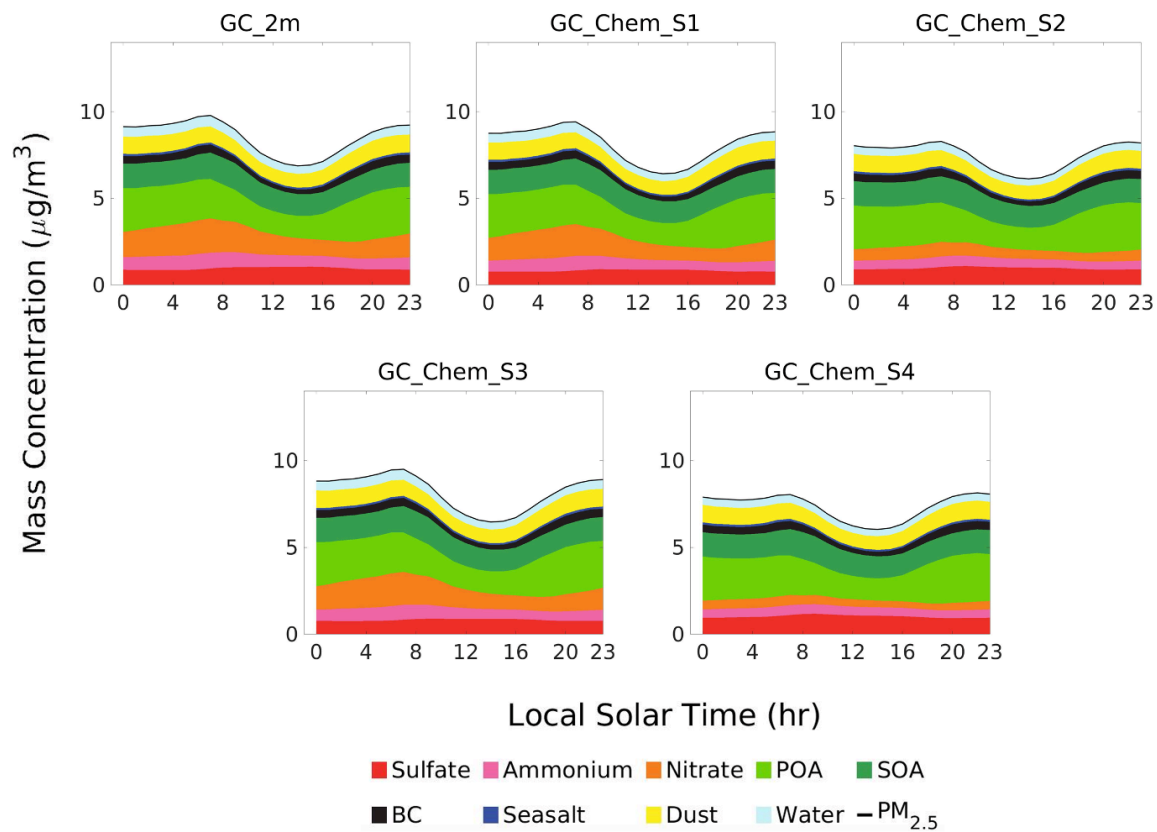

**Figure S10.** Diel profiles of  $\text{PM}_{2.5}$  composition in the sensitivity simulations investigating nitrate chemical pathways during the night (Table S3).

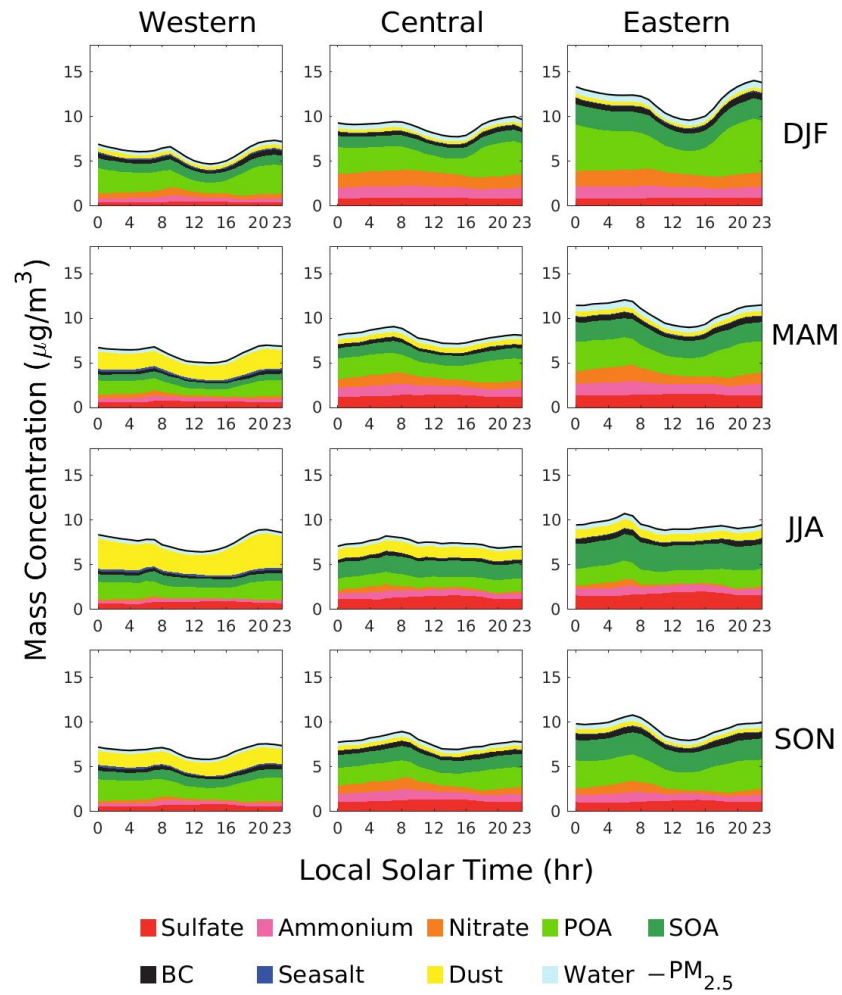

**Figure S11.** Seasonal and regional diel profiles of  $PM_{2.5}$  composition in the GC\_2m\_PBLH\_NIT (Table 1) simulation.

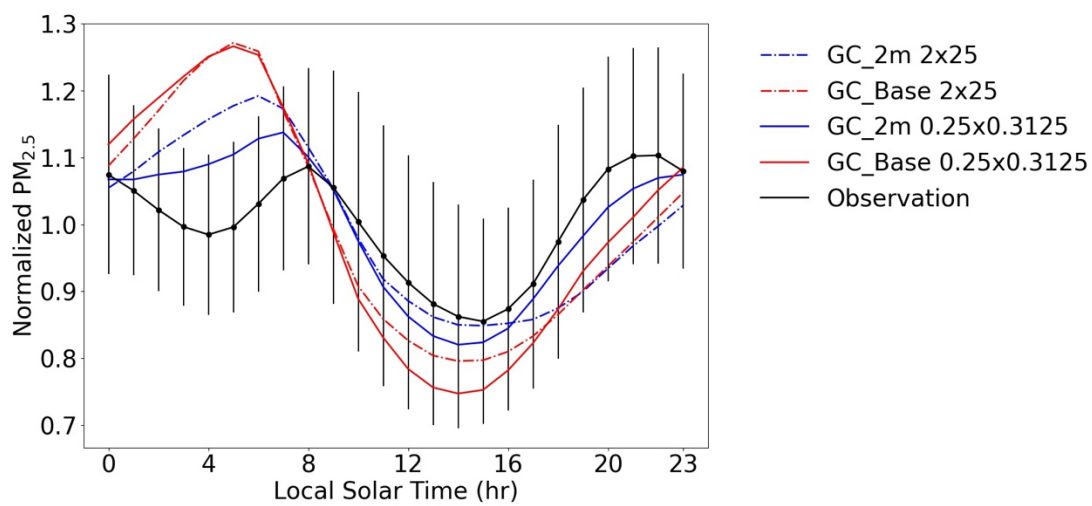

**Figure S12.** Diel PM<sub>2.5</sub> of the GC\_Base and GC\_2m simulations at different spatial resolution.

**Table S1.** RMSD of GEOS-Chem PM<sub>2.5</sub> against the FEM measurements. (Unit:  $\mu\text{g}/\text{m}^3$ )

| Region  | Season | GC Base | GC Emis | GC Drydep | GC 2m | GC 2m PBLH | GC 2m PBLH NIT |
|---------|--------|---------|---------|-----------|-------|------------|----------------|
| Western | DJF    | 2.38    | 2.13    | 2.11      | 3.04  | 2.79       | 3.45           |
|         | MAM    | 1.76    | 1.36    | 1.28      | 0.61  | 0.61       | 0.45           |
|         | JJA    | 1.66    | 1.36    | 1.31      | 1.07  | 0.90       | 0.88           |
|         | SON    | 1.37    | 0.98    | 0.96      | 0.95  | 0.44       | 0.67           |
| Central | DJF    | 3.37    | 3.24    | 3.21      | 2.65  | 3.10       | 1.40           |
|         | MAM    | 2.80    | 2.49    | 2.43      | 1.98  | 2.46       | 1.41           |
|         | JJA    | 1.83    | 1.19    | 1.06      | 0.78  | 1.20       | 0.84           |
|         | SON    | 2.32    | 1.73    | 1.64      | 1.30  | 1.86       | 1.01           |
| Eastern | DJF    | 4.77    | 4.71    | 5.01      | 4.37  | 4.87       | 3.10           |
|         | MAM    | 4.64    | 3.98    | 4.27      | 3.56  | 4.24       | 2.82           |
|         | JJA    | 2.79    | 1.79    | 1.92      | 1.36  | 2.16       | 1.76           |
|         | SON    | 3.10    | 2.39    | 2.55      | 1.83  | 2.52       | 1.67           |



**Table S2.** Supplementary GEOS-Chem simulations built upon GC\_Emis (Table 1) to investigate impacts of emissions on diel PM<sub>2.5</sub> variation. GC\_Emis\_S1 uses monthly NEI emissions with the built-in diel scaling factors in GEOS-Chem v12.6.0 (Fig. S5a). GC\_Emis\_S2 uses monthly NEI emissions with the averaged scaling profiles shown in Fig. 4. GC\_Emis\_S3 uses monthly CEDS emissions with sectoral diel scaling factors (Fig. S5b) proposed for GEOS-Chem v14 (<https://github.com/geoschem/geos-chem/issues/1824>).

| GEOS-Chem simulation | Base inventory | Temporal resolution of emissions | Diel Scaling Factors | Vertical representativeness | Aerosol dry deposition | Boundary layer mixing | Nitrate constrained |
|----------------------|----------------|----------------------------------|----------------------|-----------------------------|------------------------|-----------------------|---------------------|
| GC_Emis_S1           | NEI            | monthly                          | HEMCO                | Lowest model level center   | Default                | Default               | No                  |
| GC_Emis_S2           | NEI            | monthly                          | NEI species          | Lowest model level center   | Default                | Default               | No                  |
| GC_Emis_S3           | CEDS           | monthly                          | Sectoral average     | Lowest model level center   | Default                | Default               | No                  |

**Table S3.** Supplementary GEOS-Chem simulations built upon GC\_2m (Table 1) to investigate chemical pathways of PM<sub>2.5</sub> nitrate formation during the night.

| GEOS-Chem simulation | Nitrate nighttime chemistry                                          | Temporal resolution of emissions | Vertical representativeness | Aerosol dry deposition | Boundary layer mixing | Nitrate constrained |
|----------------------|----------------------------------------------------------------------|----------------------------------|-----------------------------|------------------------|-----------------------|---------------------|
| GC_Chem_S1           | NO <sub>2</sub> hydrolysis (Reaction R1) turned off                  | NEI hourly                       | 2m                          | Revised                | Default               | No                  |
| GC_Chem_S2           | N <sub>2</sub> O <sub>5</sub> hydrolysis (Reaction R2&R3) turned off | NEI hourly                       | 2m                          | Revised                | Default               | No                  |
| GC_Chem_S3           | NO <sub>3</sub> hydrolysis (Reaction R4) turned off                  | NEI hourly                       | 2m                          | Revised                | Default               | No                  |
| GC_Chem_S4           | All nighttime nitrate pathways (Reaction R1-R4) turned off           | NEI hourly                       | 2m                          | Revised                | Default               | No                  |

## References

- Solomon, P. A., Crumpler, D., Flanagan, J. B., Jayanty, R. K. M., Rickman, E. E., and McDade, C. E.: U.S. National PM<sub>2.5</sub> Chemical Speciation Monitoring Networks—CSN and IMPROVE: Description of networks, *Journal of the Air & Waste Management Association*, 64, 1410–1438, <https://doi.org/10.1080/10962247.2014.956904>, 2014.
- Travis, K. R., Crawford, J. H., Chen, G., Jordan, C. E., Nault, B. A., Kim, H., Jimenez, J. L., Campuzano-Jost, P., Dibb, J. E., Woo, J.-H., Kim, Y., Zhai, S., Wang, X., McDuffie, E. E., Luo, G., Yu, F., Kim, S., Simpson, I. J., Blake, D. R., Chang, L., and Kim, M. J.: Limitations in representation of physical processes prevent successful simulation of PM<sub>2.5</sub> during KORUS-AQ, *Atmos. Chem. Phys.*, 22, 7933–7958, <https://doi.org/10.5194/acp-22-7933-2022>, 2022.
